# Supplementary material for: The impact of global warming on seasonality of ocean primary production
Source: Copernicus journal article supplement (doi:10.5194/bg-10-4357-2013), 2013-06-28
Supplement: Supplementary file 1 [file bg-10-4357-2013-supplement.pdf]

## **SUPPLEMENTARY MATERIAL**

Henson et al. 'The impact of global warming on seasonality of ocean primary production'

This supplementary document contains further comparisons between observed and modelled primary production (PP) fields.

### **Comparison of observed and modelled fields of seasonality in PP**

Mean seasonal amplitude and peak timing of PP for each model is compared to the satellite-derived values (VGPM; Behrenfeld and Falkowski, 1997). The historical runs of the model for a 20-year period (1985-2005) are used to resolve long-term means. Figure S1 plots the seasonal amplitude of PP and Figure S2 shows the timing of peak PP.

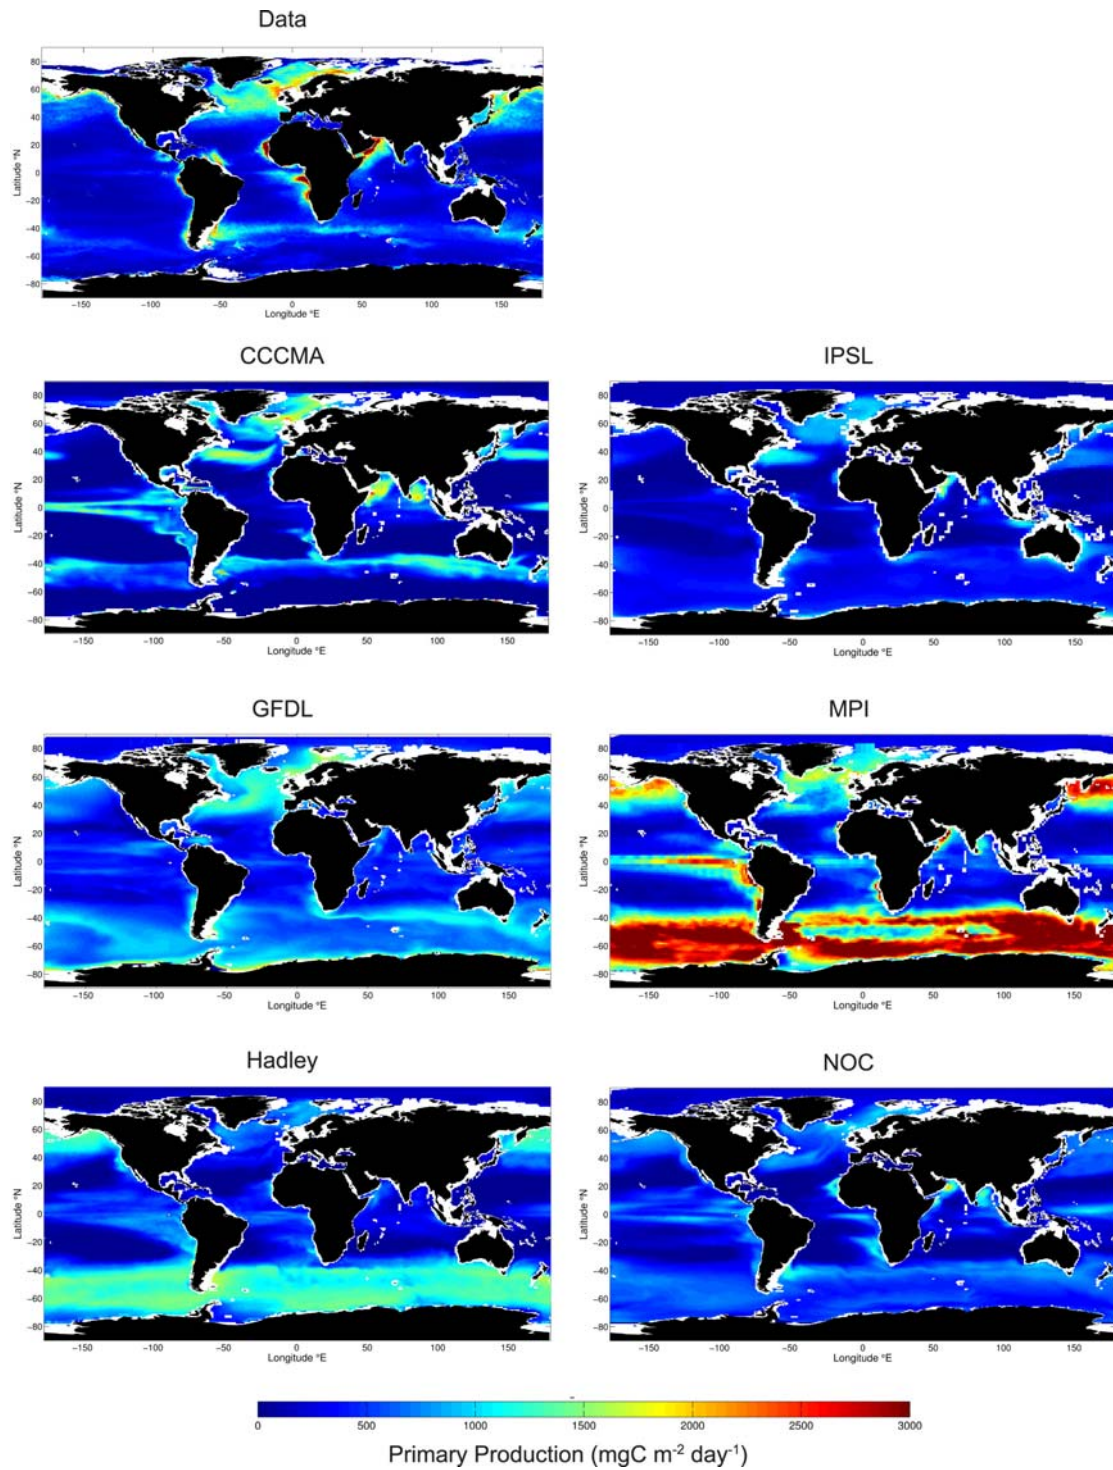

**Figure S1:** Comparison of satellite data-derived seasonal amplitude of PP (mean of 1998-2005) and the 6 models used in this study (mean of 1985-2005).

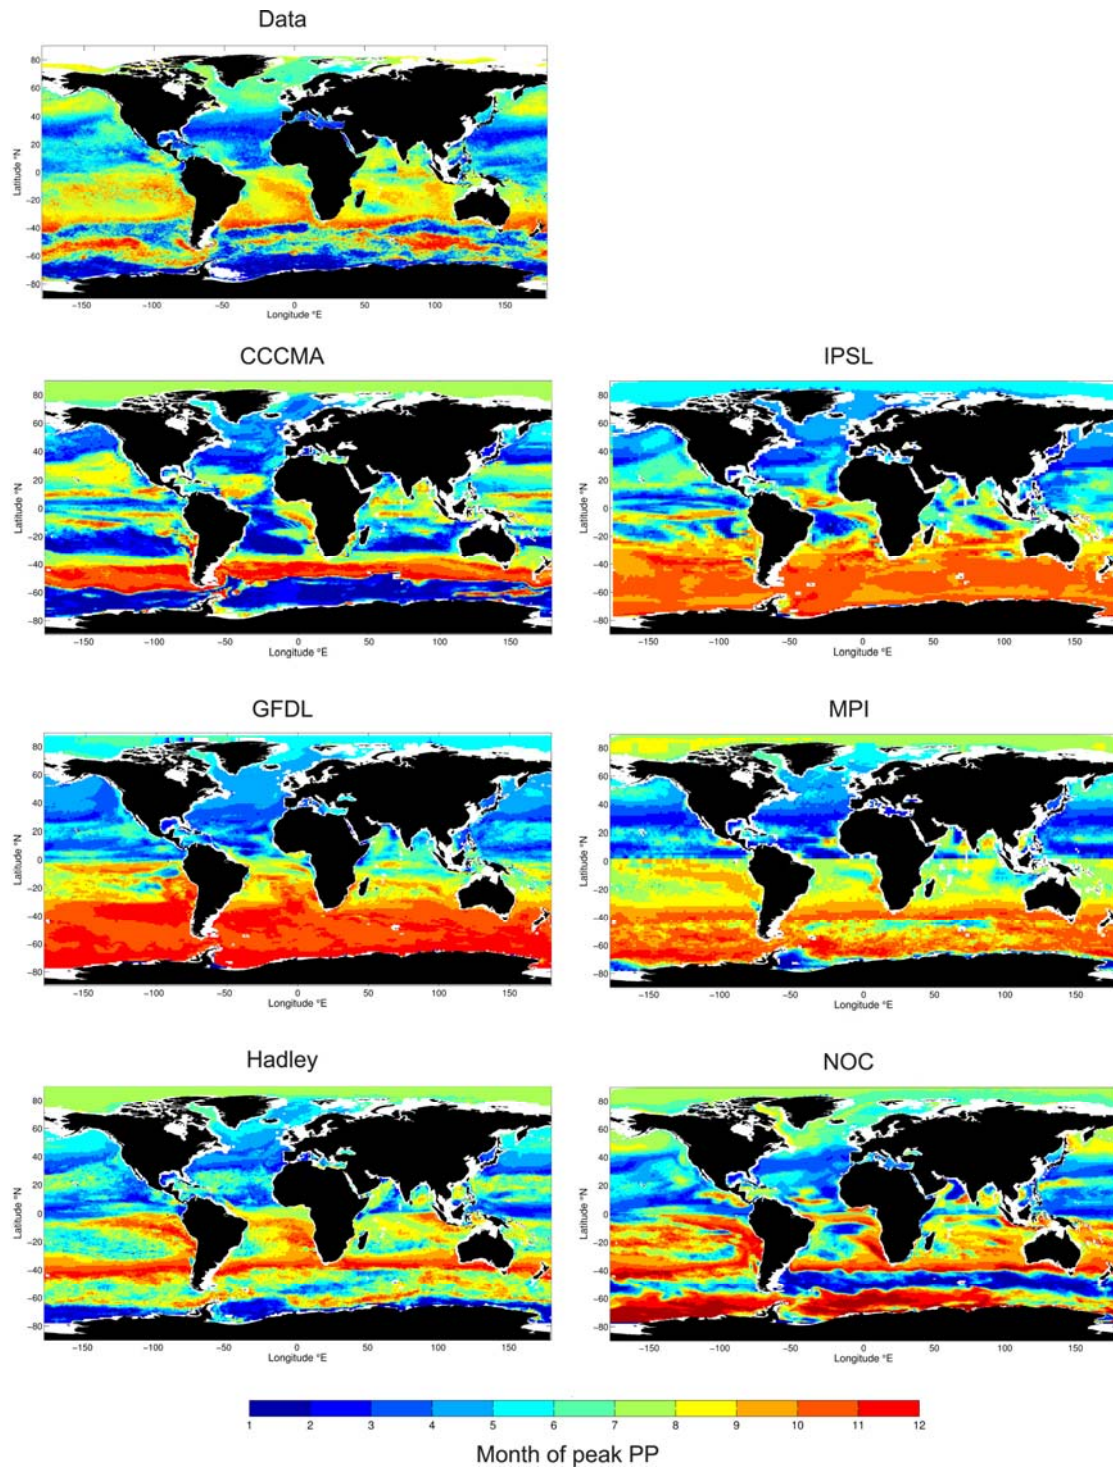

**Figure S2:** Comparison of satellite data-derived timing of peak PP (mean of 1998-2005) and the 6 models used in this study (mean of 1985-2005).

### Taylor diagrams excluding the Southern Ocean

The models typically perform poorly in the Southern Ocean (see Figures S1 and S2). As a complement to the Taylor diagrams for the global model fields shown in Figure

1 of the main text, we here present Taylor diagrams excluding the region south of 50 °S (Figure S3).

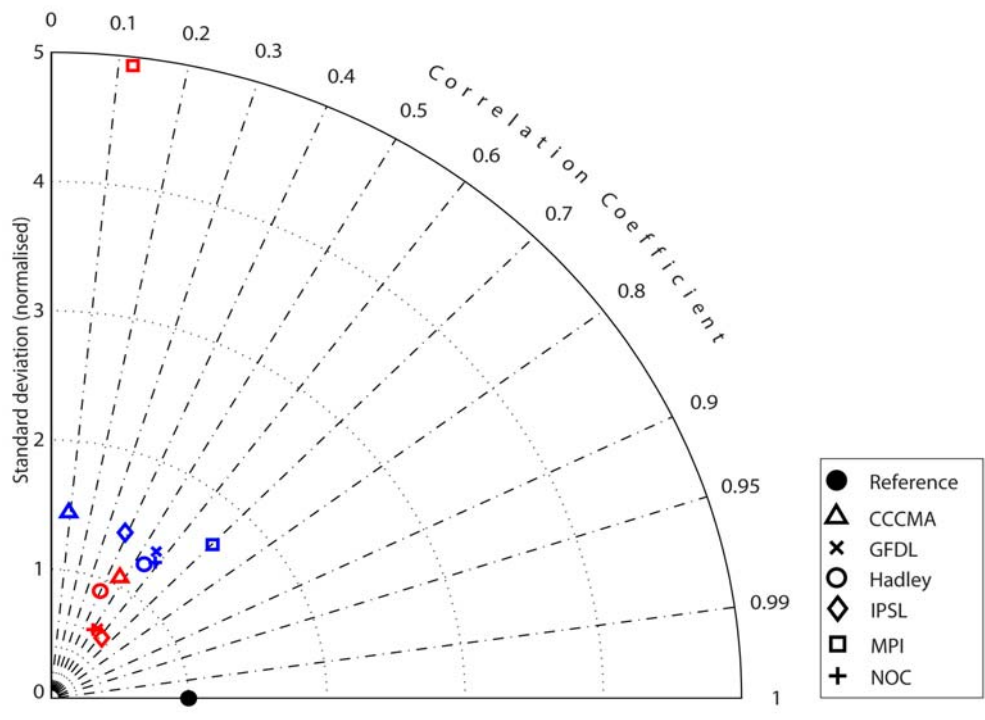

**Figure S3:** Taylor diagram showing model-data comparison of spatial variability in seasonal amplitude of PP (red) and timing of peak PP (blue) for 6 models, excluding the Southern Ocean south of 50 °S.
